# Supplementary material for: Soil type and fertilizer rate affect wheat (Triticum aestivum L.) yield, quality and nutrient use efficiency in Ayiba, northern Ethiopia
Source: PeerJ. 2022 May 9;10:e13344. doi: 10.7717/peerj.13344 (PMC9097669; doi:10.7717/peerj.13344)
Supplement: Supplemental Information 1 — NKS, number of kernels per spike; TKW, thousand kernel weight; BY, biological yield; GY, grain yield; SY, straw yield; HI, harvest index; GPC, grain protein content; HLW, hectoliter weight. [file peerj-10-13344-s001.xlsx]

## Sheet: Sheet1
Replication	Soil type	Fertilizer Rate	total tillers	productive tillers	NKS	TKW	BY	GY	SY	HI	GPC	HLW
1	V	T1	94.5	56.7	38.45	36.5	7.65	1.75	5.9	22.8758	9.75	64.3
2	V	T1	89.25	53.55	36.5	35.125	6.5	1.4	5.1	21.5385	10	63.45		NKS	number of kernels per spike
3	V	T1	92.75	55.65	37.3	36.25	7.5	1.6	5.9	21.3333	10.05	64		TKW	thousand kernel weight
1	V	T2	170.5	102.3	45.825	43.5	8.9	2.3	6.6	25.8427	12.6	60.5		BY	biological yield
2	V	T2	168	100.8	44.9	42.5	8.1	1.9	6.2	23.4568	12.4	62.3		GY	grain yield
3	V	T2	165.5	99.3	43.2	43.275	8.5	2.2	6.3	25.8824	12.3	63.4		SY	straw yield
1	V	T3	107.2	64.32	40.9	38.075	8.35	1.8	6.55	21.5569	10.85	66.85		HI	harvest index
2	V	T3	103.25	61.9	38.9	37.25	7.9	1.6	6.3	20.2532	10.45	66.55		GPC	grain protein content
3	V	T3	110.25	66.5	41.5	39.75	8.1	1.9	6.2	23.4568	10.45	66.2		HLW	hectoliter weight
1	V	T4	113.75	68.5	41.7	40.8	8.25	2.2	6.05	26.6667	11.65	70.1
2	V	T4	115.75	67.5	41.5	40.25	8	2.1	5.9	26.25	11.6	69.55
3	V	T4	111.75	64.5	40.5	39.55	8.75	1.9	6.85	21.7143	11.415	70.2
1	V	T5	173.25	103.5	46.5	43.875	9.45	2.9	6.55	30.6878	11.965	71.35
2	V	T5	167.5	100.5	44.5	41.15	9.1	2.4	6.7	26.3736	12.12	71.4
3	V	T5	178.5	107.1	46.9	43.8	8.85	2.6	6.25	29.3785	11.705	71.1
1	V	T6	190.75	114.45	48.5	46.8	9.8	3.3	6.5	33.6735	12.315	71.85
2	V	T6	176.75	106.05	47.1	46.3	9.55	3.1	6.45	32.4607	12.975	71.4
3	V	T6	180.25	108.15	47.7	46.5	9.6	3.3	6.3	34.375	12.765	72.6
1	V	T7	211.75	127.05	49.3	47.325	10.3	3.35	6.95	32.5243	13.6	72.75
2	V	T7	225.75	135.45	51.5	48.6	10.2	3.15	7.05	30.8824	13.05	72.65
3	V	T7	222.25	133.35	50.5	47.65	10.05	3.3	6.75	32.8358	13.1	73.1
1	V	T8	243.25	145.5	53.6	51.45	12.3	4.6	7.7	37.3984	14.3	73.4
2	V	T8	239.75	143.85	52.3	49.35	11.6	4.1	7.5	35.3448	14.6	74.65
3	V	T8	215.25	129.15	51.45	50.4	11.9	4.3	7.6	36.1345	14.3	74.7
1	C	T1	182.2	127.4	38.4	38.9	7.725	2.475	5.25	32.0388	9.2	62.4
2	C	T1	199.5	139.65	40.4	41.9	8.3	2.425	5.875	29.2169	9.2	62.8
3	C	T1	176.3	117.4	35.3	36.9	6.7	2.575	4.125	38.4328	9.75	61.5
1	C	T2	228.5	159.5	48.15	45.1	9.9	4.125	5.775	41.6667	12.4	64.7
2	C	T2	214	149.8	43.15	41.8	8.4	4.275	4.125	50.8929	12.6	66.5
3	C	T2	223.5	156.45	40.05	39.9	9.3	4.225	5.075	45.4301	12.3	63.8
1	C	T3	185.5	129.85	41.5	40.2	8.5	2.975	5.525	35	10.55	64.4
2	C	T3	192.5	134.75	45.35	43.45	9.3	2.975	6.325	31.9892	9.65	63.9
3	C	T3	182.5	124.75	38.75	39.65	8.2	2.925	5.275	35.6707	10.3	63.4
1	C	T4	218.3	147.3	43.7	42.9	8.9	3.775	5.125	42.4157	12.4	65.8
2	C	T4	213.5	159.45	49.4	44.9	9.8	3.625	6.175	36.9898	11.9	65.2
3	C	T4	208.7	137.5	46.9	47.9	7.9	3.865	4.035	48.9241	11.95	64.9
1	C	T5	234.5	164.15	53.8	48.65	10.75	4.225	6.525	39.3023	13.05	67.25
2	C	T5	227.5	159.25	48.9	43.55	10.2	4.165	6.035	40.8333	13.6	64.4
3	C	T5	220.5	154.35	46.2	43.8	9.7	3.975	5.725	40.9794	13.2	65.6
1	C	T6	266	186.2	57.9	46.75	10.9	4.94	5.96	45.3211	15	69.25
2	C	T6	269.5	191.65	60.25	47.45	11.5	4.675	6.825	40.6522	14.3	69.4
3	C	T6	262.5	181.3	50.5	45.05	10.3	4.725	5.575	45.8738	14.45	68.3
1	C	T7	279.2	191.1	56.5	47.05	11.3	4.875	6.425	43.1416	14	69.85
2	C	T7	265	181.8	49.7	45.3	10.8	4.875	5.925	45.1389	14.1	69.1
3	C	T7	259.6	178.3	47.35	46.4	10.5	4.825	5.675	45.9524	13.9	69.4
1	C	T8	283.5	198.45	67.4	52.35	11.7	5.375	6.325	45.9402	16.2	71.3
2	C	T8	266.9	176.2	55.65	49.4	10.5	5.375	5.125	51.1905	21.2	71
3	C	T8	276.5	183.55	58.1	48.75	10.75	5.315	5.435	49.4419	16.45	71.6
